# Supplementary material
Source: Frontiers journal article supplement (https://www.frontiersin.org/articles/219097)
Supplement: Table_3.PDF [file Table_3.PDF]

**Table S3:** Transcript (cDNA; mRNA copy) abundance detected in sediments of all stations in March and August.

| Station | Sediment depth [cm] | <i>nirS</i> gene<br>denitrifying bacteria<br>cDNA<br>[copy g <sup>-1</sup> ] |                   | 16S rRNA gene<br>anammox bacteria<br>cDNA<br>[copy g <sup>-1</sup> ] |                   | <i>aprA</i> gene<br>SOB and SRB<br>cDNA<br>[copy g <sup>-1</sup> ] |                   |
|---------|---------------------|------------------------------------------------------------------------------|-------------------|----------------------------------------------------------------------|-------------------|--------------------------------------------------------------------|-------------------|
|         |                     | March                                                                        | August            | March                                                                | August            | March                                                              | August            |
|         |                     | 1                                                                            | 0–1               | $1.8 \times 10^2$                                                    | n.d.              | $1.9 \times 10^5$                                                  | $8.1 \times 10^5$ |
| 1–2     | $1.1 \times 10^4$   |                                                                              | n.d.              | $1.8 \times 10^5$                                                    | $1.3 \times 10^3$ | n.d.                                                               | n.d.              |
| 2–3     | n.d.                |                                                                              | $1.0 \times 10^2$ | $1.0 \times 10^5$                                                    | $2.8 \times 10^5$ | $5.4 \times 10^2$                                                  | $2.5 \times 10^4$ |
| 3–4     | n.d.                |                                                                              | n.d.              | $6.5 \times 10^4$                                                    | $6.9 \times 10^5$ | n.d.                                                               | $1.1 \times 10^4$ |
| 4–5     | n.d.                |                                                                              | n.d.              | $2.5 \times 10^4$                                                    | $2.3 \times 10^5$ | n.d.                                                               | n.d.              |
| 2       | 0–1                 | $1.9 \times 10^2$                                                            | n.d.              | $8.5 \times 10^4$                                                    | $3.0 \times 10^5$ | n.d.                                                               | n.d.              |
|         | 1–2                 | $1.5 \times 10^3$                                                            | n.d.              | $6.0 \times 10^5$                                                    | $1.1 \times 10^6$ | $7.0 \times 10^3$                                                  | $7.4 \times 10^2$ |
|         | 2–3                 | $6.7 \times 10^2$                                                            | n.d.              | $9.6 \times 10^5$                                                    | $1.7 \times 10^6$ | $1.4 \times 10^4$                                                  | $3.4 \times 10^3$ |
|         | 3–4                 | n.d.                                                                         | n.d.              | $1.9 \times 10^5$                                                    | $1.3 \times 10^5$ | $1.6 \times 10^3$                                                  | $5.9 \times 10^2$ |
|         | 4–5                 | n.d.                                                                         | n.d.              | $4.8 \times 10^4$                                                    | $5.5 \times 10^4$ | n.d.                                                               | n.d.              |
| 3       | 0–1                 | $1.5 \times 10^2$                                                            | n.d.              | $4.9 \times 10^6$                                                    | $2.9 \times 10^5$ | n.d.                                                               | n.d.              |
|         | 1–2                 | n.d.                                                                         | $1.1 \times 10^2$ | $3.1 \times 10^6$                                                    | $5.1 \times 10^6$ | $3.5 \times 10^3$                                                  | $1.8 \times 10^4$ |
|         | 2–3                 | n.d.                                                                         | n.d.              | $4.1 \times 10^5$                                                    | $3.1 \times 10^6$ | $5.0 \times 10^2$                                                  | $4.3 \times 10^2$ |
|         | 3–4                 | n.d.                                                                         | $1.8 \times 10^3$ | $2.2 \times 10^5$                                                    | $1.3 \times 10^5$ | $1.4 \times 10^3$                                                  | $3.7 \times 10^3$ |
|         | 4–5                 | n.d.                                                                         | n.d.              | $8.5 \times 10^4$                                                    | $3.7 \times 10^4$ | n.d.                                                               | n.d.              |

qPCR conditions: 95°C 4 min; 40 × [95°C 30 s, Tm 40 s, 72°C 30 s]; 80°C 25 s. nd: non detectable, i.e. values were under the detection limit of the qPCR approach.
